# Supplementary material
Source: Springer Nature journal article supplement (https://www.springermedizin.de/resource/supplementary/12943_2013_1490_MOESM8_ESM.pdf/9553180)

A

Introduction of  
miR-630 into  
drug-resistant  
cell

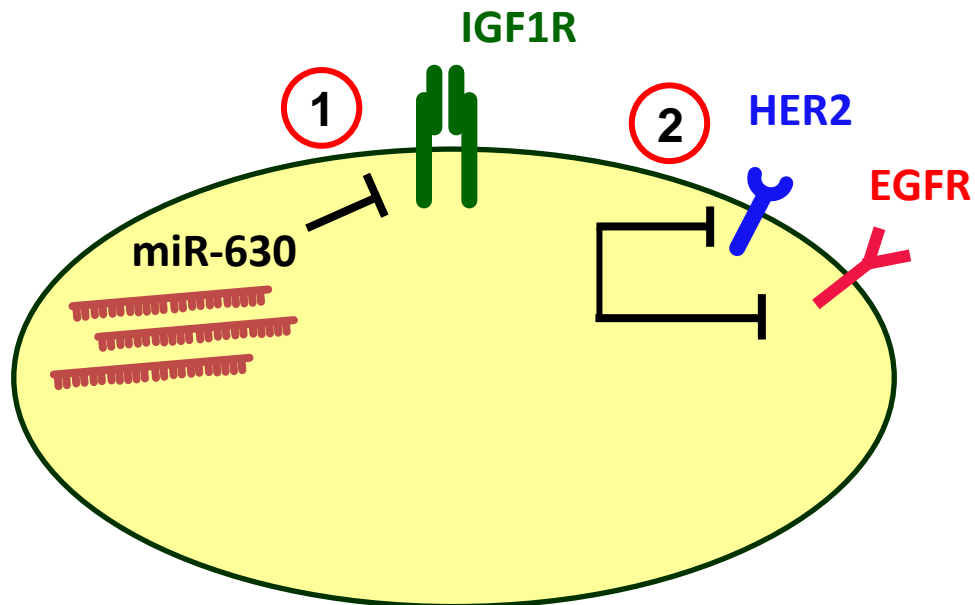

B

Inhibition of  
miR-630 in  
drug-sensitive  
cell

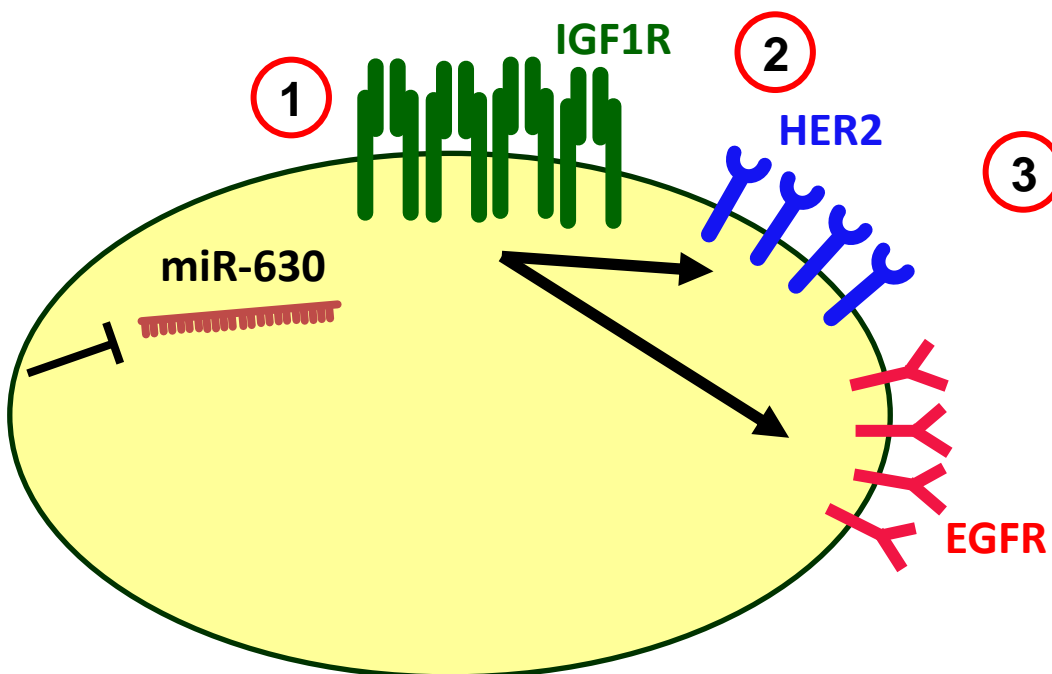

Supplement: MOESM8 [file 9553180]
